# Supplementary material
Source: PubMed Central journal article supplement (PMC8919678)

# IHC Human Liver Controls for GPNMB – 200x

Negative Control (no 1° Ab)

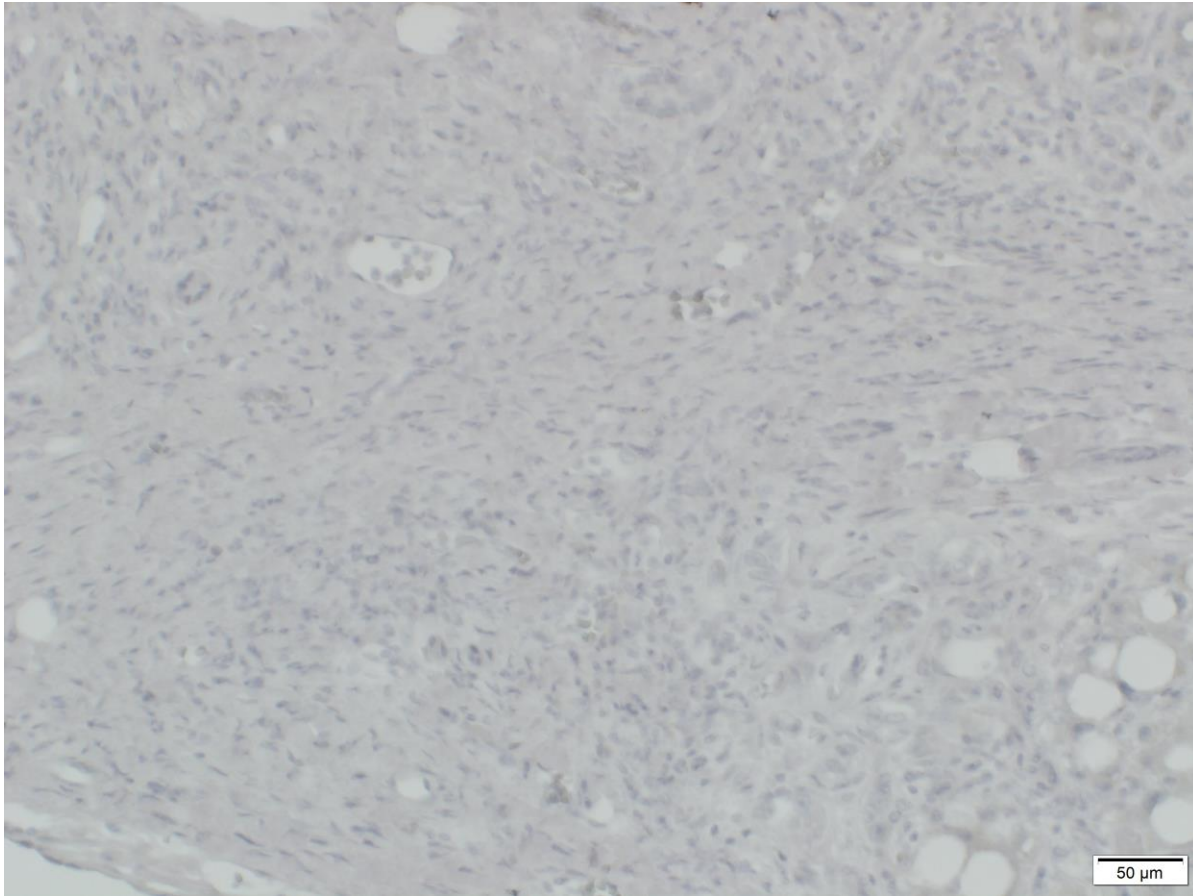

Positive Control

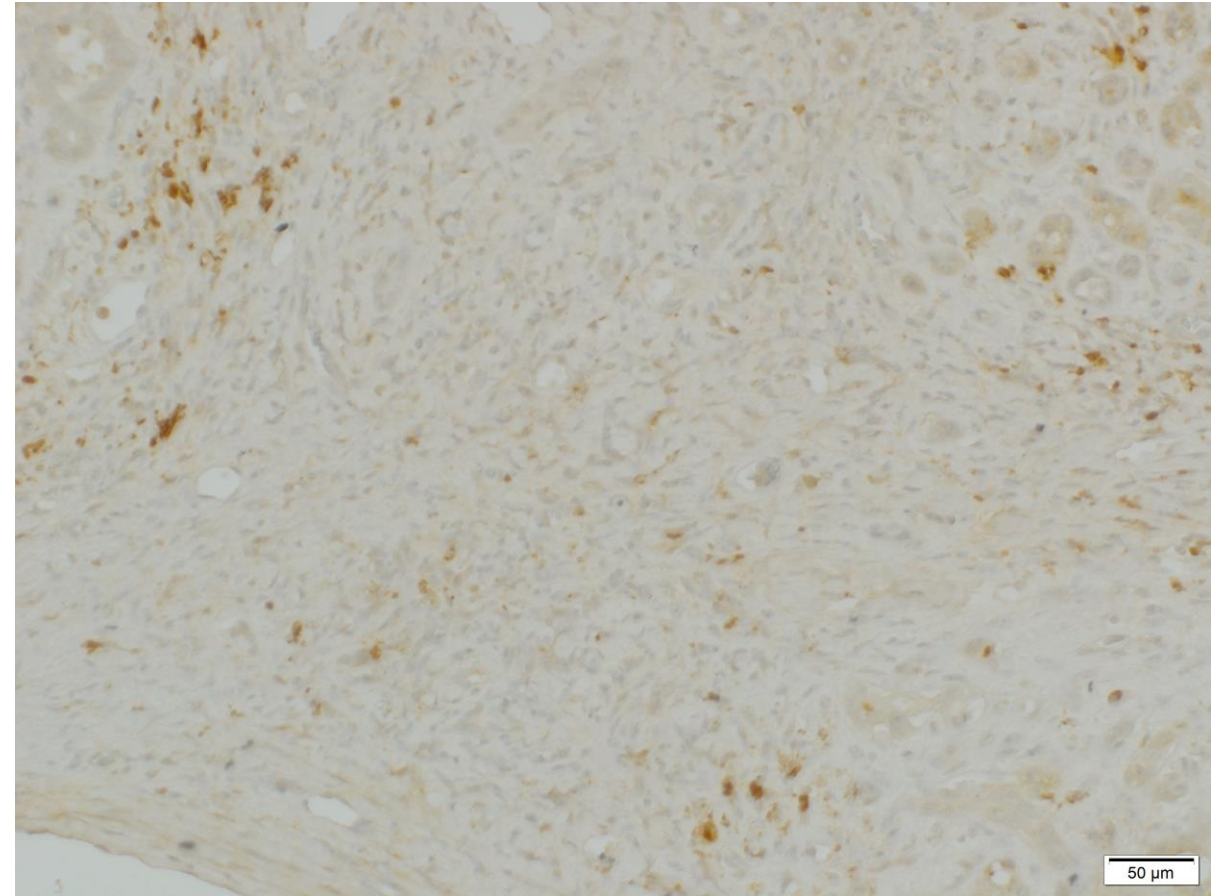

# IHC Human Liver Controls for CD68 – 200x

Negative Control (no 1° Ab)

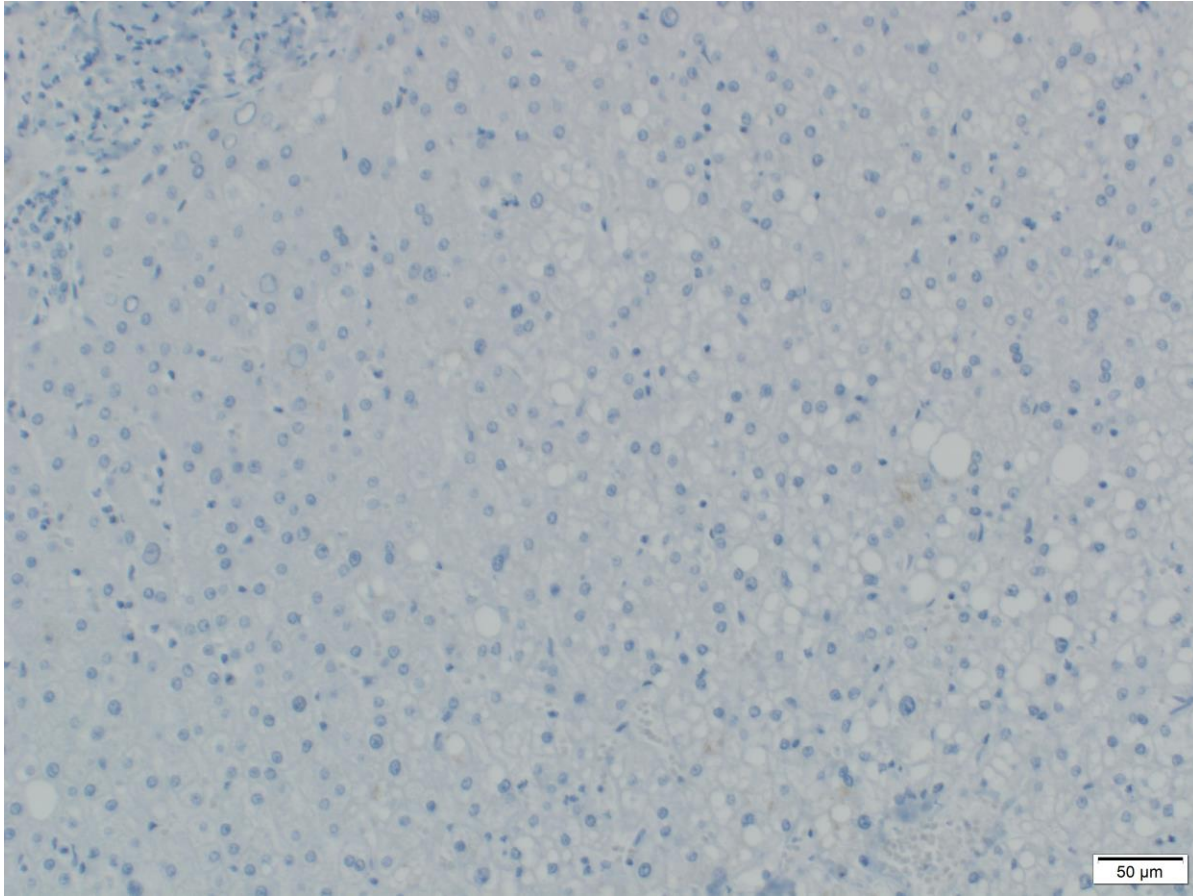

Positive Control

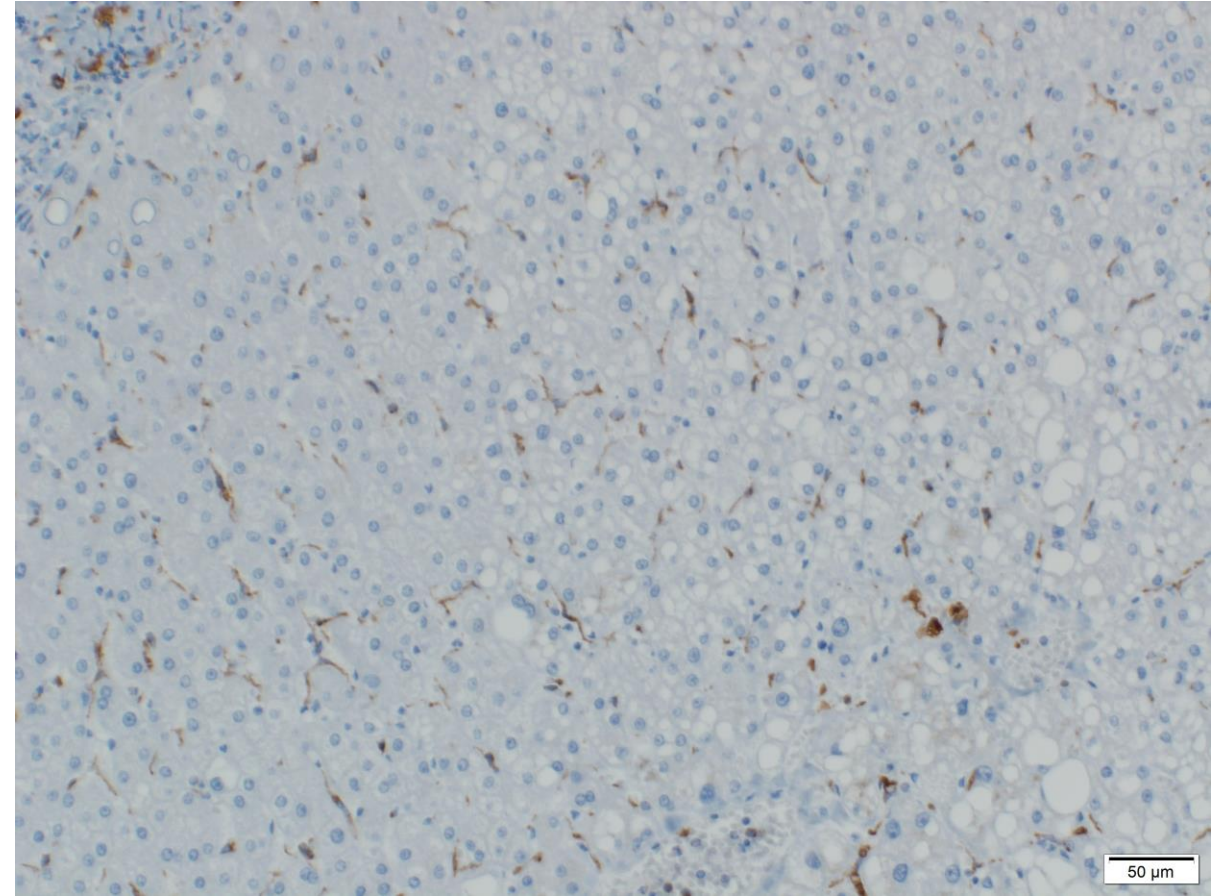

Supplement: NIHMS1765638-supplement-1.pdf [file NIHMS1765638-supplement-1.pdf]
